# Supplementary material for: Leisure-time vigorous physical activity is associated with better lung function: the prospective ECRHS study
Source: PubMed Central journal article supplement — Thorax. 2018 Jan 6;73(4):376–84. doi: 10.1136/thoraxjnl-2017-210947 (PMC5870462; doi:10.1136/thoraxjnl-2017-210947), 2018-01-06
Supplement: thoraxjnl-2017-210947supp001.pdf [file thoraxjnl-2017-210947supp001.pdf]

**SUPPLEMENTAY FILE**

**Leisure-time vigorous physical activity is associated with better lung function: the prospective  
ECRHS study**

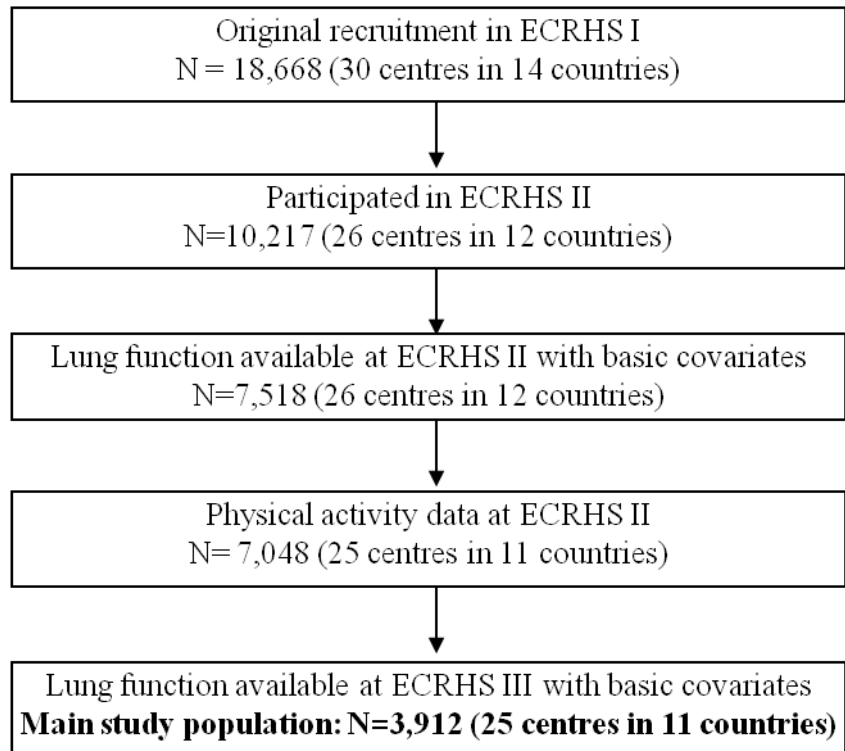

**Figure S1.** Flow chart of study population

**Table S1.** Instruments used at the first (ECRHS II) and second (ECRHS III) spirometry examination

| <b>Study centre</b> | <b>Year of spirometry first examination</b> | <b>Instrument used first examination</b> | <b>Year of spirometry second examination</b> | <b>Instrument used second examination</b> |
|---------------------|---------------------------------------------|------------------------------------------|----------------------------------------------|-------------------------------------------|
| Albacete            | 2000-2001                                   | Biomedin spiro                           | 2011-2013                                    | NDD                                       |
| Antwerp City        | 2000-2002                                   | Jaeger pneum                             | 2013-2013                                    | NDD                                       |
| Antwerp South       | 2001-2002                                   | Jaeger pneum                             | 2013-2013                                    | NDD                                       |
| Barcelona           | 2000-2001                                   | Biomedin spiro                           | 2011-2012                                    | NDD                                       |
| Basel               | 2001-2002                                   | SensorMedics hot wire                    | 2010-2011                                    | NDD                                       |
| Bergen              | 2002-2002                                   | SensorMedics displacement                | 2011-2012                                    | NDD                                       |
| Bordeaux            | 2001-2003                                   | Vitalograph spiro                        | 2012-2013                                    | NDD                                       |
| Erfurt              | 2000-2001                                   | Jaeger pneum                             | 2011-2012                                    | NDD                                       |
| Galdakao            | 2000-2001                                   | Biomedin spiro                           | 2011-2013                                    | NDD                                       |
| Gothenburg          | 2000-2001                                   | SensorMedics displacement                | 2011-2012                                    | NDD                                       |
| Grenoble            | 2001-2002                                   | Biomedin spiro                           | 2011-2012                                    | NDD                                       |
| Hamburg             | 2000-2001                                   | Jaeger pneum                             | 2011-2012                                    | NDD                                       |
| Huelva              | 1999-2001                                   | Biomedin spiro                           | 2011-2012                                    | NDD                                       |
| Ipswich             | 1999-2001                                   | Biomedin spiro                           | 2012-2013                                    | NDD                                       |
| Montpellier         | 2001-2002                                   | Biomedin spiro                           | 2011-2013                                    | NDD                                       |
| Norwich             | 1999-2001                                   | Biomedin spiro                           | 2012-2013                                    | NDD                                       |
| Oviedo              | 2000-2001                                   | Biomedin spiro                           | 2011-2012                                    | NDD                                       |
| Paris               | 2000-2002                                   | Biomedin spiro                           | 2011-2012                                    | NDD                                       |
| Pavia               | 2000-2001                                   | Biomedin spiro                           | 2012-2013                                    | NDD                                       |
| Reykjavik           | 2000-2001                                   | SensorMedics displacement                | 2012-2013                                    | NDD                                       |
| Tartu               | 2001-2002                                   | Jaeger pneum                             | 2013-2014                                    | NDD                                       |
| Turin               | 2000-2001                                   | Biomedin spiro                           | 2012-2013                                    | Biomedin spiro                            |
| Umea                | 1999-2000                                   | SensorMedics displacement                | 2011-2012                                    | NDD                                       |
| Uppsala             | 1999-2000                                   | SensorMedics displacement                | 2011-2013                                    | NDD                                       |
| Verona              | 2000-2002                                   | Biomedin spiro                           | 2010-2013                                    | Biomedin spiro                            |

**Table S2:** Association estimates for all covariates included in the main analyses on the relationship between physical activity and FEV<sub>1</sub>.

| Covariates                             |                                    | Frequency <sup>a</sup> |                       | Duration <sup>a</sup> |                       | Active status <sup>a</sup> |                       | Change in active status <sup>b</sup> |                       |
|----------------------------------------|------------------------------------|------------------------|-----------------------|-----------------------|-----------------------|----------------------------|-----------------------|--------------------------------------|-----------------------|
|                                        |                                    | Mean difference (mL)   | 95% CI                | Mean difference (mL)  | 95% CI                | Mean difference (mL)       | 95% CI                | Mean difference (mL)                 | 95% CI                |
| Intercept                              |                                    | <b>3176.9</b>          | <b>3107.5, 3246.4</b> | <b>3170.4</b>         | <b>3101.1, 3239.7</b> | <b>3166.4</b>              | <b>3098.3, 3234.4</b> | <b>2977.1</b>                        | <b>2925.3, 3029.0</b> |
| Sex                                    | Female                             | reference              | reference             | reference             | reference             | reference                  | reference             | reference                            | reference             |
|                                        | Male                               | <b>643.5</b>           | <b>600.5, 686.5</b>   | <b>643.0</b>          | <b>599.9, 686.0</b>   | <b>645.0</b>               | <b>602.0, 688.0</b>   | <b>92.5</b>                          | <b>65.3, 119.6</b>    |
| Age in years (centred)                 |                                    | <b>-28.5</b>           | <b>-30.7, -26.4</b>   | <b>-28.4</b>          | <b>-30.6, -26.2</b>   | <b>-28.3</b>               | <b>-30.5, -26.2</b>   | <b>-9.5</b>                          | <b>-10.9, -8.2</b>    |
| Age <sup>2</sup> in years (centred)    |                                    | -0.1                   | -0.4, 0.2             | -0.1                  | -0.4, 0.2             | -0.1                       | -0.4, 0.2             | 0.1                                  | -0.1, 0.2             |
| Height in cm (centred)                 |                                    | <b>35.7</b>            | <b>33.5, 38.0</b>     | <b>35.7</b>           | <b>33.5, 38.0</b>     | <b>35.7</b>                | <b>33.5, 38.0</b>     | 0.9                                  | -0.7, 2.5             |
| Weight in kg (centred)                 |                                    | <b>-6.3</b>            | <b>-7.2, -5.4</b>     | <b>-6.3</b>           | <b>-7.2, -5.4</b>     | <b>-6.3</b>                | <b>-7.2, -5.4</b>     | 0.1                                  | -0.6, 0.8             |
| Smoking                                | Never                              | reference              | reference             | reference             | reference             | reference                  | reference             | reference                            | reference             |
|                                        | Ex-smoker < 15 pack-years          | 11.3                   | -23.0, 45.6           | 7.2                   | -27.2, 41.6           | 9.0                        | -25.4, 43.4           | 13.5                                 | -8.5, 35.5            |
|                                        | Ex-smoker ≥ 15 pack-years          | <b>-98.7</b>           | <b>-136.7, -60.7</b>  | <b>-100.9</b>         | <b>-139.0, -62.8</b>  | <b>-100.3</b>              | <b>-138.4, -62.3</b>  | <b>-48.9</b>                         | <b>-78.2, -19.5</b>   |
|                                        | Current smoker < 15 pack-years     | <b>-43.6</b>           | <b>-83.7, -3.5</b>    | <b>-46.6</b>          | <b>-86.8, -6.5</b>    | <b>-47.1</b>               | <b>-87.2, -7.0</b>    | <b>-62.6</b>                         | <b>-91.5, -33.6</b>   |
|                                        | Current smoker ≥ 15 pack-years     | <b>-127.9</b>          | <b>-165.6, -90.3</b>  | <b>-129.7</b>         | <b>-167.4, -92.1</b>  | <b>-129.8</b>              | <b>-167.4, -92.2</b>  | <b>-112.6</b>                        | <b>-138.5, -86.8</b>  |
| Secondhand smoke exposure at home/work | No                                 | reference              | reference             | reference             | reference             | reference                  | reference             | reference                            | reference             |
|                                        | yes                                | -11.5                  | -29.2, 6.1            | -11.2                 | -28.9, 6.5            | -10.6                      | -28.3, 7.1            | -10.1                                | -28.9, 8.7            |
| Age completed full time education      | < 17 years                         | reference              | reference             | reference             | reference             | reference                  | reference             | reference                            | reference             |
|                                        | 17-20 years                        | <b>49.3</b>            | <b>3.4, 95.2</b>      | <b>48.4</b>           | <b>2.6, 94.3</b>      | <b>49.7</b>                | <b>3.9, 95.5</b>      | 21.6                                 | -4.2, 47.5            |
|                                        | > 20 years                         | <b>51.0</b>            | <b>3.1, 98.9</b>      | <b>49.2</b>           | <b>1.3, 97.1</b>      | <b>51.5</b>                | <b>3.6, 99.3</b>      | 25.4                                 | -1.7, 52.5            |
| Occupation                             | Management/professional/non-manual | reference              | reference             | reference             | reference             | reference                  | reference             | reference                            | reference             |
|                                        | Technical/professional/non-manual  | -10.1                  | -53.0, 32.8           | -8.9                  | -51.9, 34.1           | -8.1                       | -51.0, 34.9           | -18.6                                | -42.8, 5.6            |
|                                        | Other non-manual                   | 5.1                    | -36.6, 46.8           | 8.3                   | -33.5, 50.1           | 8.1                        | -33.6, 49.9           | -2.1                                 | -25.6, 21.4           |
|                                        | Skilled manual                     | 18.9                   | -37.0, 74.8           | 17.3                  | -38.6, 73.2           | 17.9                       | -37.9, 73.8           | 11.4                                 | -19.9, 42.6           |
|                                        | Semi-skilled/unskilled manual      | -11.9                  | -70.0, 46.2           | -13.1                 | -71.2, 45.1           | -15.1                      | -73.1, 42.8           | 9.6                                  | -22.8, 42.1           |

|                                           |              |                     |              |                     |              |                     |            |                 |
|-------------------------------------------|--------------|---------------------|--------------|---------------------|--------------|---------------------|------------|-----------------|
| Other/unknown                             | 15.2         | -51.3, 81.7         | 11.6         | -55.4, 78.6         | 9.8          | -57.1, 76.7         | 13.8       | -24.4, 52.0     |
| Time between follow-ups in years          | <b>-39.4</b> | <b>-40.8, -38.0</b> | <b>-39.9</b> | <b>-41.3, -38.5</b> | <b>-39.2</b> | <b>-40.4, -38.1</b> | na         | na              |
| FEV <sub>1</sub> at first follow-up in mL | na           | na                  | na           | na                  | na           | na                  | <b>0.8</b> | <b>0.8, 0.8</b> |

95% CI =95% confidence intervals; FEV<sub>1</sub> = forced expiratory volume in one second; na = not applicable

<sup>a</sup> Models include a physical activity parameter, as well as adjustments for sex, age, age-squared, height, weight, smoking status, secondhand smoke exposure, education and occupation. An interaction term between time between follow-ups and the physical activity parameter was included to capture the effect of physical activity on lung function decline. Results for the effects of the physical activity parameters on lung function levels and decline (main associations of interest) are presented in Table 4 in the manuscript.

<sup>b</sup> Models include a physical activity parameter, as well as adjustments for sex, age, age-squared, height, weight, smoking status, secondhand smoke exposure, education, occupation and FEV<sub>1</sub> at the first examination.

bold: *P* value < 0.05

**Table S3:** Association estimates for all covariates included in the main analyses on the relationship between physical activity and FVC.

| Covariates                             |                                    | Frequency <sup>a</sup> |                       | Duration <sup>a</sup> |                       | Active status <sup>a</sup> |                       | Change in active status <sup>b</sup> |                       |
|----------------------------------------|------------------------------------|------------------------|-----------------------|-----------------------|-----------------------|----------------------------|-----------------------|--------------------------------------|-----------------------|
|                                        |                                    | Mean difference (mL)   | 95% CI                | Mean difference (mL)  | 95% CI                | Mean difference (mL)       | 95% CI                | Mean difference (mL)                 | 95% CI                |
| Intercept                              |                                    | <b>3968.1</b>          | <b>3885.8, 4050.4</b> | <b>3970.7</b>         | <b>3888.9, 4052.6</b> | <b>3963.2</b>              | <b>3882.5, 4043.9</b> | <b>3899.7</b>                        | <b>3834.8, 3964.5</b> |
| Sex                                    | Female                             | reference              | reference             | reference             | reference             | reference                  | reference             | reference                            | reference             |
|                                        | Male                               | <b>747.5</b>           | <b>698.6, 796.4</b>   | <b>744.0</b>          | <b>695.0, 793.0</b>   | <b>746.8</b>               | <b>697.8, 795.7</b>   | <b>115.0</b>                         | <b>79.1, 151.0</b>    |
| Age in years (centred)                 |                                    | <b>-26.1</b>           | <b>-28.6, -23.7</b>   | <b>-26.0</b>          | <b>-28.4, -23.5</b>   | <b>-25.9</b>               | <b>-28.4, -23.5</b>   | <b>-12.6</b>                         | <b>-14.3, -10.9</b>   |
| Age <sup>2</sup> in years (centred)    |                                    | <b>-0.4</b>            | <b>-0.7, -0.0</b>     | <b>-0.4</b>           | <b>-0.7, -0.0</b>     | <b>-0.4</b>                | <b>-0.7, -0.0</b>     | 0.0                                  | -0.2, 0.2             |
| Height in cm (centred)                 |                                    | <b>54.4</b>            | <b>51.8, 57.0</b>     | <b>54.4</b>           | <b>51.8, 56.9</b>     | <b>54.4</b>                | <b>51.8, 57.0</b>     | <b>7.6</b>                           | <b>5.4, 9.8</b>       |
| Weight in kg (centred)                 |                                    | <b>-8.3</b>            | <b>-9.3, -7.2</b>     | <b>-8.2</b>           | <b>-9.3, -7.2</b>     | <b>-8.2</b>                | <b>-9.3, -7.2</b>     | <b>-2.0</b>                          | <b>-2.9, -1.0</b>     |
| Smoking                                | Never                              | reference              | reference             | reference             | reference             | reference                  | reference             | reference                            | reference             |
|                                        | Ex-smoker < 15 pack-years          | <b>40.2</b>            | <b>0.6, 79.8</b>      | 34.9                  | -4.8, 74.6            | 38.3                       | -1.4, 78.0            | 13.3                                 | -15.3, 42.0           |
|                                        | Ex-smoker ≥ 15 pack-years          | -28.8                  | -72.9, 15.4           | -32.8                 | -77.0, 11.4           | -31.7                      | -75.9, 12.5           | <b>-50.8</b>                         | <b>-89.0, -12.6</b>   |
|                                        | Current smoker < 15 pack-years     | -5.3                   | -53.2, 42.6           | -8.8                  | -56.7, 39.1           | -9.0                       | -56.9, 38.9           | <b>-50.0</b>                         | <b>-87.5, -12.6</b>   |
|                                        | Current smoker ≥ 15 pack-years     | <b>-58.2</b>           | <b>-102.0, -14.4</b>  | <b>-60.6</b>          | <b>-104.3, -16.8</b>  | <b>-59.2</b>               | <b>-103.0, -15.5</b>  | <b>-91.4</b>                         | <b>-125.0, -57.8</b>  |
| Secondhand smoke exposure at home/work | No                                 | reference              | reference             | reference             | reference             | reference                  | reference             | reference                            | reference             |
|                                        | yes                                | -16.4                  | -38.7, 5.9            | -16.1                 | -38.5, 6.3            | -15.4                      | -37.8, 7.0            | -19.6                                | -43.9, 4.8            |
| Age completed full time education      | < 17 years                         | reference              | reference             | reference             | reference             | reference                  | reference             | reference                            | reference             |
|                                        | 17-20 years                        | 25.7                   | -26.1, 77.4           | 22.9                  | -28.8, 74.6           | 24.4                       | -27.3, 76.1           | <b>49.2</b>                          | <b>15.6, 82.7</b>     |
|                                        | > 20 years                         | 38.5                   | -15.5, 92.5           | 34.9                  | -19.1, 88.9           | 37.3                       | -16.7, 91.3           | <b>61.0</b>                          | <b>25.8, 96.1</b>     |
| Occupation                             | Management/professional/non-manual | reference              | reference             | reference             | reference             | reference                  | reference             | reference                            | reference             |
|                                        | Technical/professional/non-manual  | -21.5                  | -69.7, 26.8           | -19.3                 | -67.6, 29.0           | -18.0                      | -66.3, 30.3           | -30.6                                | -62.1, 0.8            |
|                                        | Other non-manual                   | 1.7                    | -45.2, 48.6           | 4.7                   | -42.3, 51.7           | 4.2                        | -42.8, 51.2           | -1.0                                 | -31.6, 29.5           |
|                                        | Skilled manual                     | 25.1                   | -37.7, 88.0           | 24.5                  | -38.3, 87.4           | 26.3                       | -36.4, 89.1           | 19.3                                 | -21.4, 59.9           |
|                                        | Semi-skilled/unskilled manual      | -28.0                  | -93.5, 37.4           | -30.9                 | -96.4, 34.5           | -31.1                      | -96.4, 34.2           | 25.4                                 | -17.0, 67.8           |

|                              |              |                     |       |                     |              |                     |            |                 |
|------------------------------|--------------|---------------------|-------|---------------------|--------------|---------------------|------------|-----------------|
| Other/unknown                | 5.9          | -68.9, 80.6         | 1.0   | -74.3, 76.3         | 0.9          | -74.5, 76.2         | 2.6        | -46.8, 52.1     |
| Time between follow-ups      | <b>-27.9</b> | <b>-29.7, -26.1</b> | -29.0 | <b>-30.8, -27.2</b> | <b>-27.9</b> | <b>-29.4, -26.4</b> | na         | na              |
| FVC at first follow-up in mL | na           | na                  | na    | na                  | na           | na                  | <b>0.8</b> | <b>0.8, 0.8</b> |

95% CI =95% confidence intervals; FVC= forced vital capacity; na = not applicable

<sup>a</sup> Models include a physical activity parameter, as well as adjustments for sex, age, age-squared, height, weight, smoking status, secondhand smoke exposure, education and occupation. An interaction term between time between follow-ups and the physical activity parameter was included to capture the effect of physical activity on lung function decline. Results for the effects of the physical activity parameters on lung function levels and decline (main associations of interest) are presented in Table 4 in the manuscript.

<sup>b</sup> Models include a physical activity parameter, as well as adjustments for sex, age, age-squared, height, weight, smoking status, secondhand smoke exposure, education, occupation and FVC at the first examination.

bold: *P* value < 0.05

**Table S4.** Associations between vigorous physical activity and the FEV<sub>1</sub>/FVC ratio

| Vigorous physical activity levels                                                                |                                |                  | FEV <sub>1</sub> /FVC |                   |                     |
|--------------------------------------------------------------------------------------------------|--------------------------------|------------------|-----------------------|-------------------|---------------------|
|                                                                                                  |                                | N                | Mean difference       | 95% CI            |                     |
| <b>Association with lung function<sup>a</sup></b>                                                | Frequency                      | <= 1 a month     | 3869                  | reference         |                     |
|                                                                                                  |                                | 1-3 times a week |                       | -0.13             | -0.57, 0.30         |
|                                                                                                  |                                | > 4 times a week |                       | <b>-1.10</b>      | <b>-1.73, -0.47</b> |
|                                                                                                  | Duration (per week)            | <= 30 minutes    | 3839                  | reference         |                     |
|                                                                                                  |                                | 1-3 hours        |                       | 0.08              | -0.37, 0.52         |
|                                                                                                  |                                | >= 4 hours       |                       | <b>-0.68</b>      | <b>-1.27, -0.09</b> |
| Active                                                                                           | >= 2 times a week and >=1 hour | 3837             | -0.16                 | -0.57, 0.26       |                     |
| <b>Change in physical activity status on lung function at the second examination<sup>b</sup></b> | Remained non-active            | 3518             | reference             |                   |                     |
|                                                                                                  | Became inactive                |                  | 0.34                  | -0.07, 0.76       |                     |
|                                                                                                  | Became active                  |                  | 0.13                  | -0.25, 0.50       |                     |
|                                                                                                  | Remained active                |                  | <b>0.47</b>           | <b>0.10, 0.84</b> |                     |

95% CI =95% confidence intervals; FEV<sub>1</sub> = forced expiratory volume in one second; FVC = forced vital capacity; N = number of participants included in the model

<sup>a</sup> adjusted for sex, age, age-squared, height, weight, smoking status, secondhand smoke exposure, education and occupation. A positive estimate suggests that those more active at the first examination had higher average lung function at both examinations than those less active.

<sup>c</sup> adjusted for sex, age, age-squared, height, weight, smoking status, secondhand smoke exposure, education, occupation and lung function at first examination. A positive estimate suggests better lung function on average at the second examination

bold: *P* value < 0.05



**Table S5.** Associations between vigorous physical activity and forced expiratory volume in one second, stratified by smoking status at the first examination

| Vigorous physical activity levels                                                                | Never smokers                  |                      |                   | Ex-smokers   |                      |                  | Current smokers |                      |                    |                    |
|--------------------------------------------------------------------------------------------------|--------------------------------|----------------------|-------------------|--------------|----------------------|------------------|-----------------|----------------------|--------------------|--------------------|
|                                                                                                  | N                              | Mean difference (mL) | 95% CI            | N            | Mean difference (mL) | 95% CI           | N               | Mean difference (mL) | 95% CI             |                    |
| <b>Association with lung function<sup>a</sup></b>                                                |                                |                      |                   |              |                      |                  |                 |                      |                    |                    |
| Frequency                                                                                        | <= 1 a month                   | 1784                 | reference         | 1129         | reference            |                  | 974             | reference            |                    |                    |
|                                                                                                  | 1-3 times a week               |                      | 1.34              | -46.9, 49.6  | -39.2                | -103.4, 25.0     |                 | <b>74.3</b>          | <b>10.5, 138.1</b> |                    |
|                                                                                                  | > 4 times a week               |                      | -44.3             | -112.4, 23.9 | 33.9                 | -59.9, 127.7     |                 | 68.9                 | -24.9, 162.7       |                    |
| Duration (per week)                                                                              | <= 30 minutes                  | 1766                 | reference         | 1117         | reference            |                  | 974             | reference            |                    |                    |
|                                                                                                  | 1-3 hours                      |                      | 0.3               | -47.9, 48.5  | -39.3                | -105.6, 27.0     |                 | <b>88.0</b>          | <b>22.7, 153.2</b> |                    |
|                                                                                                  | >= 4 hours                     |                      | -30.7             | -97.6, 36.2  | 44.6                 | -38.0, 127.3     |                 | <b>109.0</b>         | <b>18.8, 199.1</b> |                    |
| Active                                                                                           | >= 2 times a week and >=1 hour | 1766                 | 10.0              | -34.6, 54.6  | 1115                 | 21.2             | -39.2, 81.6     | 974                  | <b>117.2</b>       | <b>53.9, 180.5</b> |
| <b>Change in physical activity status on lung function at the second examination<sup>b</sup></b> |                                |                      |                   |              |                      |                  |                 |                      |                    |                    |
| Remained non-active                                                                              | 1670                           | reference            |                   | 1073         | reference            |                  | 951             | reference            |                    |                    |
| Became inactive                                                                                  |                                | <b>36.6</b>          | <b>0.3, 72.9</b>  |              | -33.0                | -78.6, 12.6      |                 | 5.9                  | -44.4, 56.2        |                    |
| Became active                                                                                    |                                | <b>45.8</b>          | <b>11.9, 79.6</b> |              | 29.8                 | -9.9, 69.6       |                 | 43.7                 | -1.4, 88.7         |                    |
| Remained active                                                                                  |                                | <b>40.0</b>          | <b>8.3, 71.6</b>  |              | <b>42.3</b>          | <b>2.4, 82.3</b> |                 | 26.9                 | -21.1, 75.0        |                    |

95% CI =95% confidence intervals; N = number of participants included in the model

<sup>a</sup> adjusted for sex, age, age-squared, height, secondhand smoke exposure, education, occupation and lifetime pack-years smoked. A positive estimate suggests that those more active at the first examination had higher average lung function at both examinations than those less active.

<sup>b</sup> adjusted for sex, age, age-squared, height, secondhand smoke exposure, education, occupation, lifetime pack-years smoked and lung function at first examination. A positive estimate suggests better lung function on average at the second examination

bold: *P* value < 0.05

**Table S6.** Associations between vigorous physical activity and forced vital capacity, stratified by by smoking status at the first examination

| Vigorous physical activity levels                                                                | Never smokers                  |                      |                    | Ex-smokers  |                      |                   | Current smokers |                      |                    |                    |
|--------------------------------------------------------------------------------------------------|--------------------------------|----------------------|--------------------|-------------|----------------------|-------------------|-----------------|----------------------|--------------------|--------------------|
|                                                                                                  | N                              | Mean difference (mL) | 95% CI             | N           | Mean difference (mL) | 95% CI            | N               | Mean difference (mL) | 95% CI             |                    |
| <b>Association with lung function<sup>a</sup></b>                                                |                                |                      |                    |             |                      |                   |                 |                      |                    |                    |
| Frequency                                                                                        | <= 1 a month                   | 1782                 | reference          | 1121        | reference            |                   | 970             | reference            |                    |                    |
|                                                                                                  | 1-3 times a week               |                      | 3.0                | -52.8, 58.8 | -36.8                | -109.0, 35.3      |                 | <b>88.6</b>          | <b>13.8, 163.4</b> |                    |
|                                                                                                  | > 4 times a week               |                      | 12.1               | -66.8, 91.0 | 41.2                 | -63.9, 146.3      |                 | <b>163.8</b>         | <b>53.4, 274.1</b> |                    |
| Duration (per week)                                                                              | <= 30 minutes                  | 1764                 | reference          | 1109        | reference            |                   | 970             | reference            |                    |                    |
|                                                                                                  | 1-3 hours                      |                      | 5.8                | -50.1, 61.7 | -66.1                | -140.6, 8.4       |                 | <b>91.4</b>          | <b>14.9, 167.8</b> |                    |
|                                                                                                  | >= 4 hours                     |                      | 9.1                | -68.1, 86.3 | 51.0                 | -41.5, 143.5      |                 | <b>187.7</b>         | <b>81.8, 293.6</b> |                    |
| Active                                                                                           | >= 2 times a week and >=1 hour | 1764                 | 29.6               | -22.1, 81.3 | 1107                 | 8.8               | -59.0, 76.6     | 970                  | <b>146.4</b>       | <b>72.2, 220.7</b> |
| <b>Change in physical activity status on lung function at the second examination<sup>b</sup></b> |                                |                      |                    |             |                      |                   |                 |                      |                    |                    |
| Remained non-active                                                                              | 1610                           | reference            |                    | 1050        | reference            |                   | 924             | reference            |                    |                    |
| Became inactive                                                                                  |                                | 37.7                 | -9.6, 85.0         |             | -32.9                | -92.8, 27.0       |                 | -5.0                 | -70.5, 60.5        |                    |
| Became active                                                                                    |                                | <b>69.7</b>          | <b>25.6, 113.8</b> |             | 26.2                 | -26.0, 78.4       |                 | <b>76.0</b>          | <b>17.5, 134.5</b> |                    |
| Remained active                                                                                  |                                | 33.1                 | -8.1, 74.2         |             | 54.2                 | <b>2.2, 106.2</b> |                 | <b>14.2</b>          | <b>-47.4, 75.8</b> |                    |

95% CI =95% confidence intervals; N = number of participants included in the model

<sup>a</sup> adjusted for sex, age, age-squared, height, secondhand smoke exposure, education, occupation and lifetime pack-years smoked. A positive estimate suggests that those more active at the first examination had higher average lung function at both examinations than those less active.

<sup>b</sup> adjusted for sex, age, age-squared, height, smoking status, secondhand smoke exposure, education, occupation, lifetime pack-years smoked and lung function at first examination. A positive estimate suggests better lung function on average at the second examination

bold: *P* value < 0.05

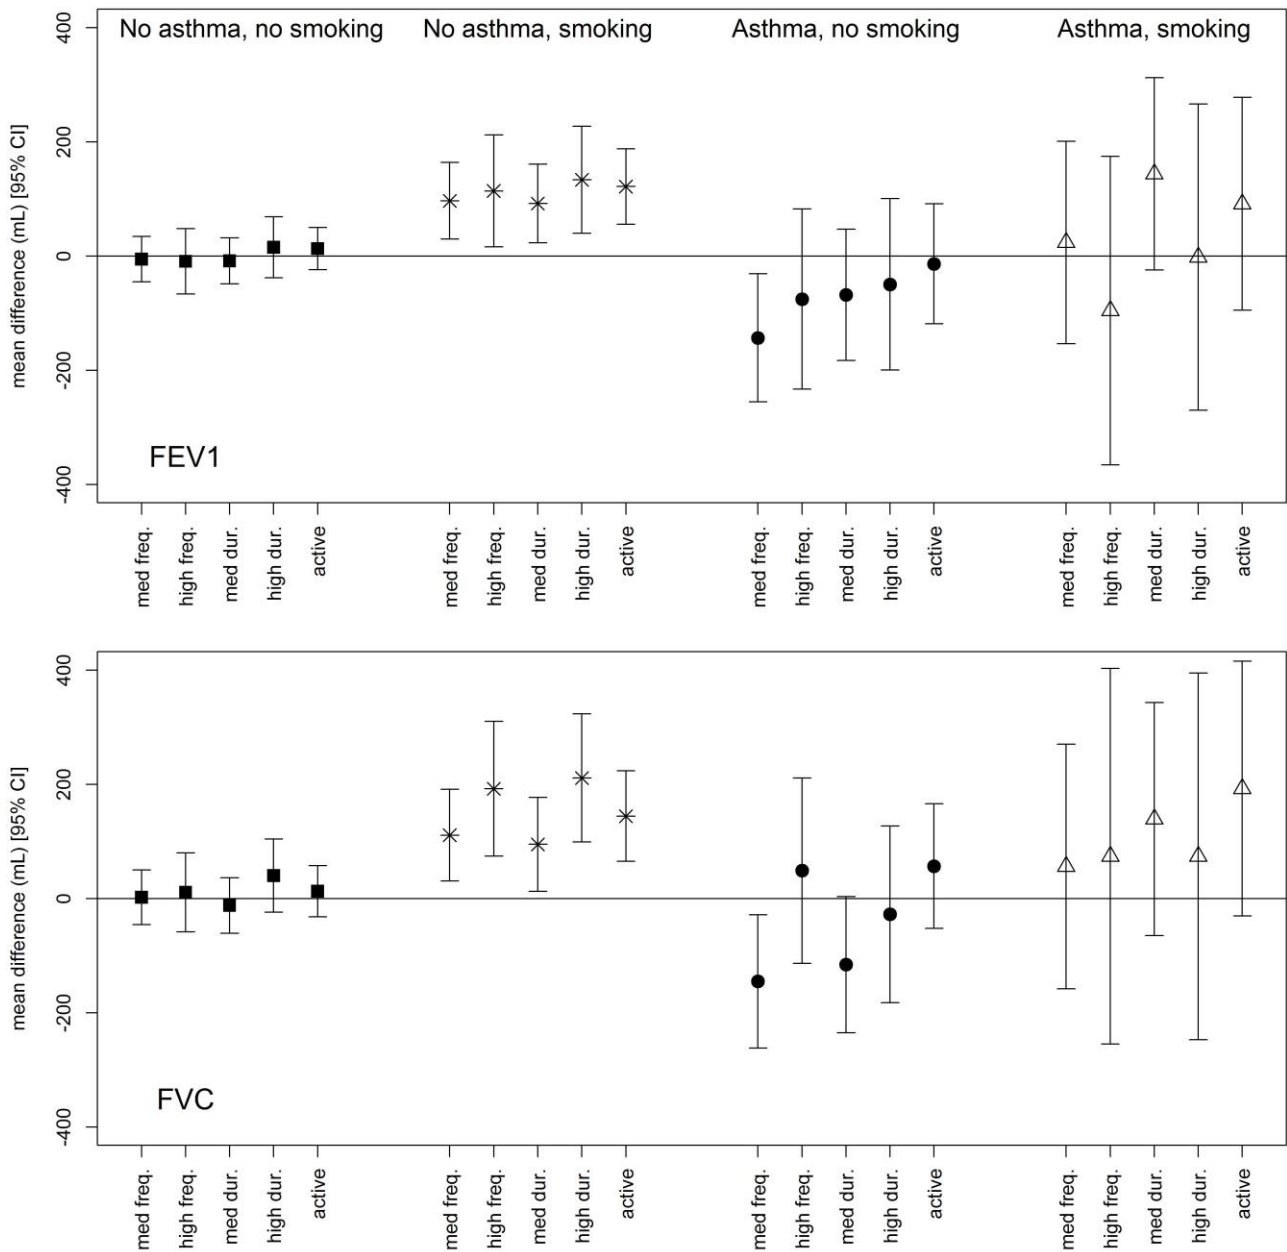

**Figure S2.** Associations between physical activity variables at the first examination and lung function, stratified by asthma status and smoking behaviour. All models are adjusted for sex, age, age-squared, height, weight, secondhand smoke exposure, education, occupation and lifetime pack-years smoked.

Filled squares = no asthma and no current smoking; stars = no asthma and current smoking; filled circles = asthma and no current smoking; open triangles: asthma and current smoking. For frequency, low:  $\leq 1$  a month; med: 1-3 times a week; high:  $> 4$  times a week. For duration, low:  $\leq 30$  minutes; med: 1-3 hours; high:  $\geq 4$  hours. Active:  $\geq 2$  times and  $\geq 1$  hour per week.

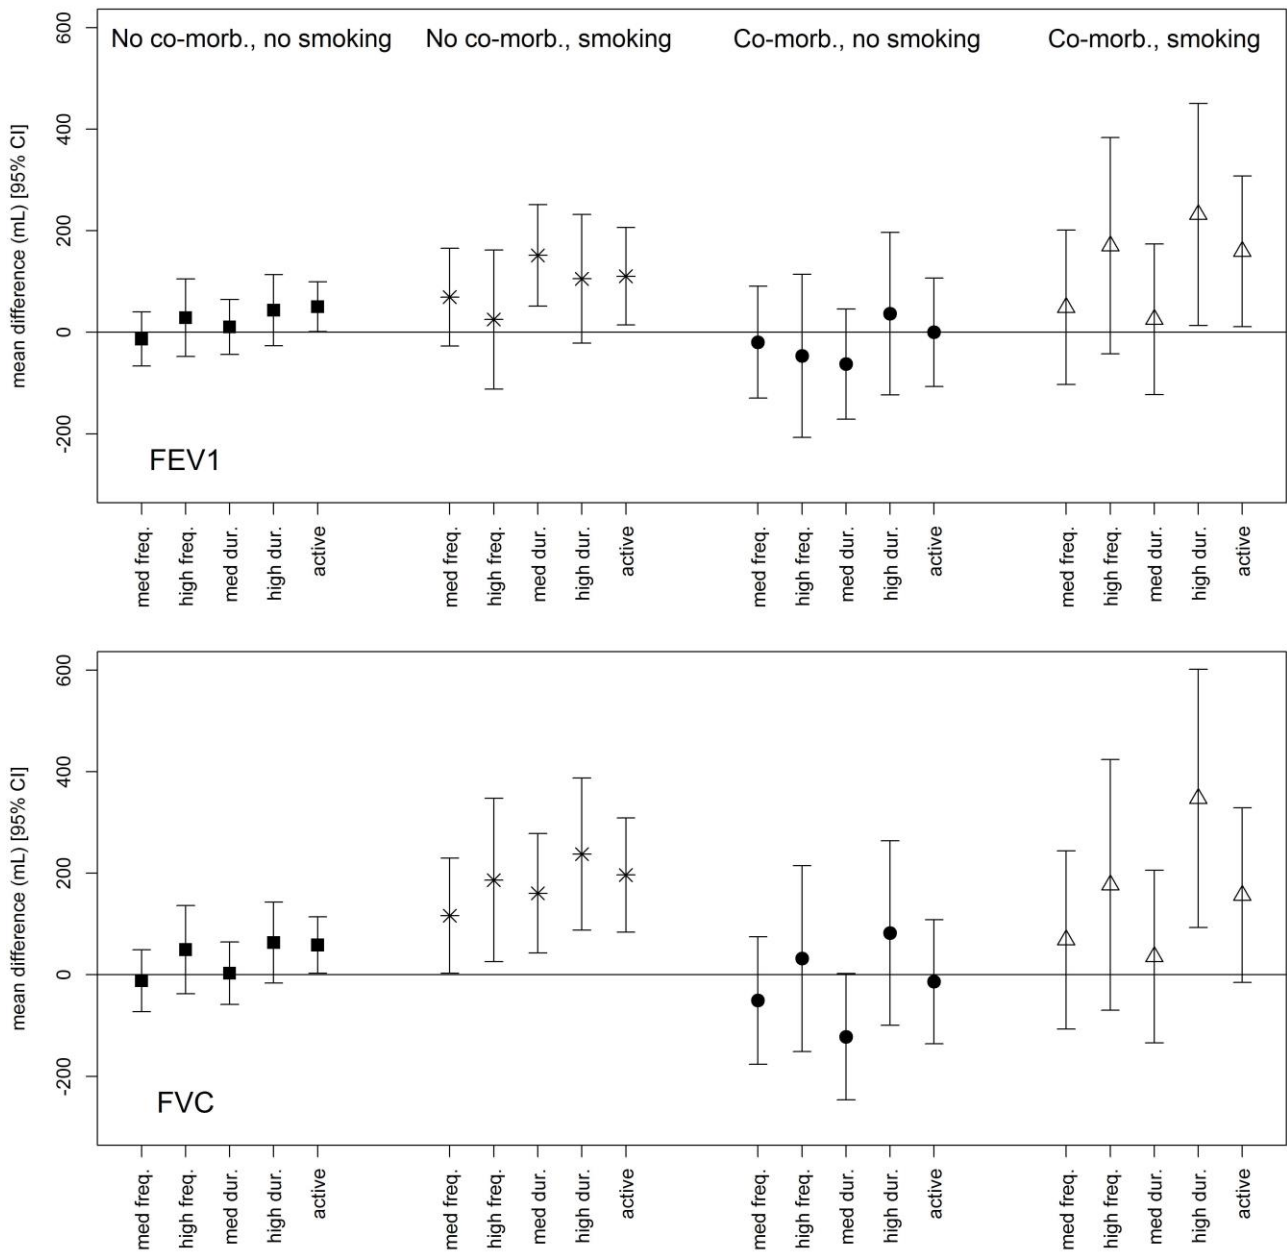

**Figure S3.** Associations between vigorous physical activity variables at the first examination and lung function, stratified by co-morbidity status and smoking behaviour. All models are adjusted for sex, age, age-squared, height, weight, secondhand smoke exposure, education, occupation and lifetime pack-years smoked.

Filled squares = no co-morbidity and no current smoking; stars = no co-morbidity and current smoking; filled circles = co-morbidity and no current smoking; open triangles: co-morbidity and current smoking. For frequency, low:  $\leq 1$  a month; med: 1-3 times a week; high:  $> 4$  times a week. For duration, low:  $\leq 30$  minutes; med: 1-3 hours; high:  $\geq 4$  hours. Active:  $\geq 2$  times and  $\geq 1$  hour per week.

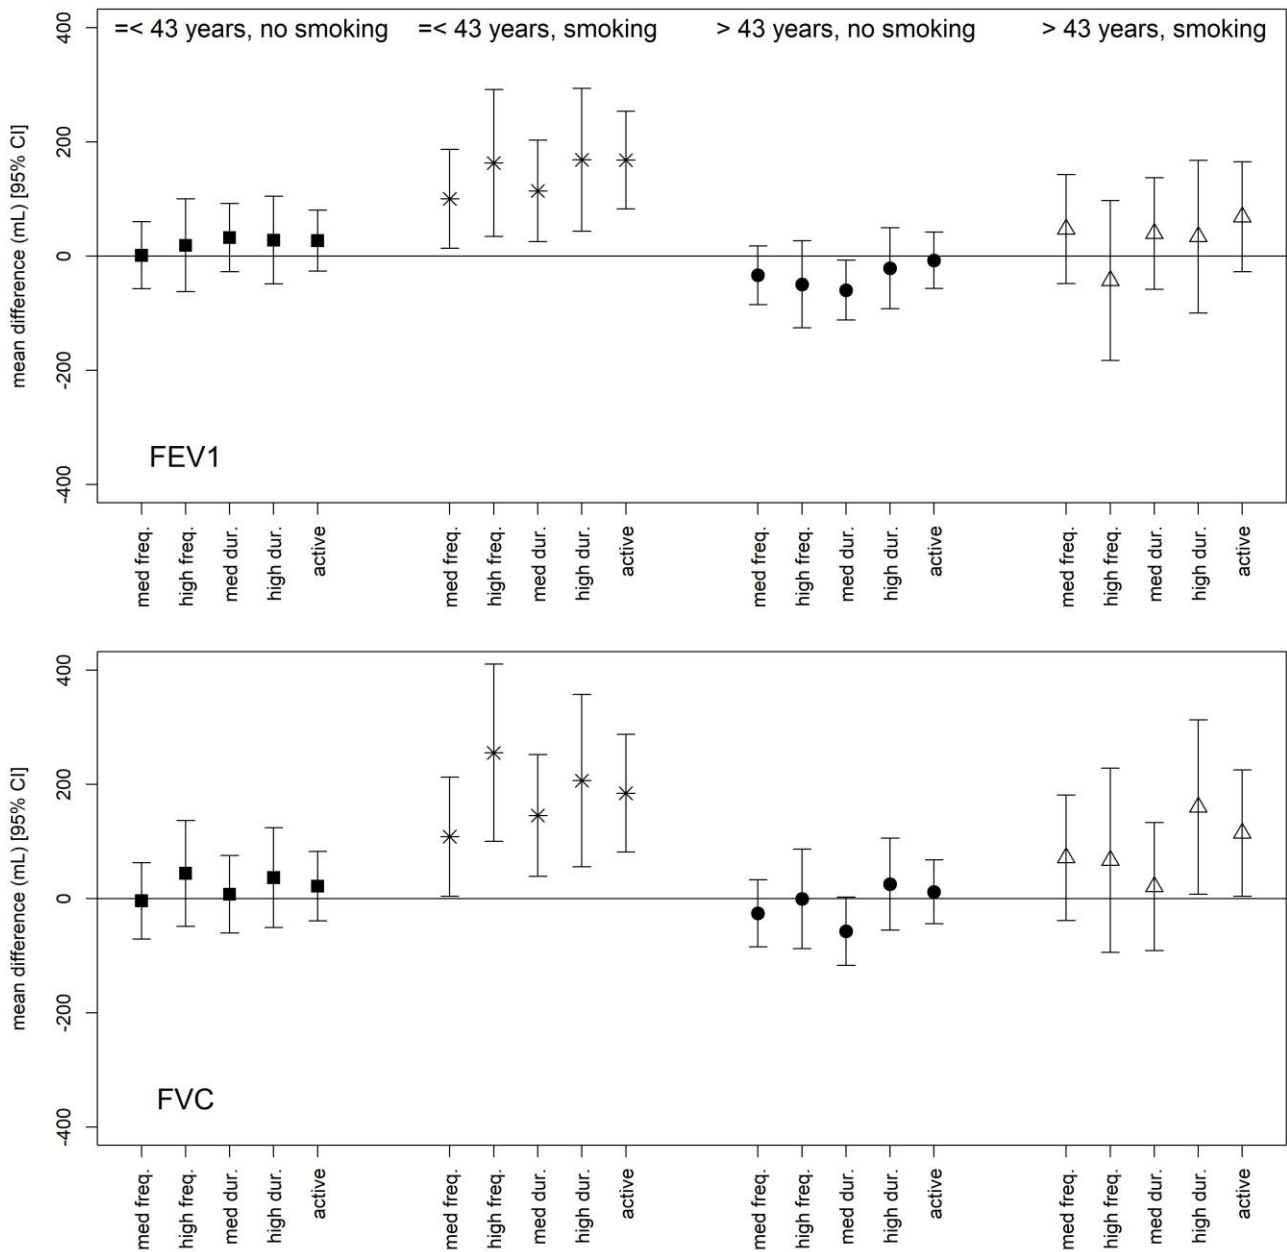

**Figure S4.** Associations between vigorous physical activity variables at the first examination and lung function, stratified by the median age at the first follow-up and smoking behaviour. All models are adjusted for sex, age at first follow-up, age-squared at first follow-up, height, weight, secondhand smoke exposure, education, occupation and lifetime pack-years smoked.

Filled squares = less than or equal to 43 years of age and no current smoking; stars = less than or equal to 43 years of age and current smoking; filled circles = greater than 43 years of age and no current smoking; open triangles: greater than 43 years of age and current smoking. For frequency, low: ≤ 1 a month; med: 1-3 times a week; high: > 4 times a week. For duration, low: ≤ 30 minutes; med: 1-3 hours; high: ≥ 4 hours. Active: ≥ 2 times and ≥ 1 hour per week.

**Table S7.** Associations between vigorous physical activity and lung function, stratified by sex

| Vigorous physical activity levels                                                                | FEV <sub>1</sub> (mL)          |                 |             |                   |                 |                   | FVC (mL)    |                    |             |                    |                 |        |             |
|--------------------------------------------------------------------------------------------------|--------------------------------|-----------------|-------------|-------------------|-----------------|-------------------|-------------|--------------------|-------------|--------------------|-----------------|--------|-------------|
|                                                                                                  | Males                          |                 |             | Females           |                 |                   | Males       |                    |             | Females            |                 |        |             |
|                                                                                                  | N                              | Mean difference | 95% CI      | N                 | Mean difference | 95% CI            | N           | Mean difference    | 95% CI      | N                  | Mean difference | 95% CI |             |
| <b>Association with lung function<sup>a</sup></b>                                                |                                |                 |             |                   |                 |                   |             |                    |             |                    |                 |        |             |
| Frequency                                                                                        | <= 1 a month                   | 1900            | reference   | 1987              | reference       | 1892              | reference   | 1980               | reference   |                    |                 |        |             |
|                                                                                                  | 1-3 times a week               |                 | -2.2        | -57.3, 52.9       | 20.4            | -17.8, 58.5       | 29.1        | -32.9, 91.2        | 2.2         | -42.0, 46.5        |                 |        |             |
|                                                                                                  | > 4 times a week               |                 | 7.1         | -74.3, 88.4       | 9.1             | -44.9, 63.1       | 80.3        | -11.6, 172.2       | 39.6        | -22.9, 102.0       |                 |        |             |
| Duration                                                                                         | <= 30 minutes                  | 1889            | reference   | 1968              | reference       | 1881              | reference   | 1961               | reference   |                    |                 |        |             |
|                                                                                                  | 1-3 hours                      |                 | 14.6        | -42.1, 71.3       | 16.3            | -22.0, 54.6       | 28.1        | -35.8, 92.1        | -4.8        | -49.2, 39.6        |                 |        |             |
|                                                                                                  | >= 4 hours                     |                 | 39.8        | -32.4, 112.0      | 8.5             | -45.4, 62.4       | <b>94.9</b> | <b>13.5, 176.2</b> | 27.4        | -34.8, 89.7        |                 |        |             |
| Active                                                                                           | >= 2 times a week and >=1 hour | 1888            | <b>54.6</b> | <b>2.5, 106.6</b> | 1967            | 20.0              | -16.3, 56.3 | 1880               | <b>79.9</b> | <b>21.3, 138.6</b> | 1960            | 20.3   | -21.8, 62.3 |
| <b>Change in physical activity status on lung function at the second examination<sup>b</sup></b> |                                |                 |             |                   |                 |                   |             |                    |             |                    |                 |        |             |
| Remained non-active                                                                              |                                | 1804            | reference   | 1890              | reference       | 1743              | reference   | 1841               | reference   |                    |                 |        |             |
| Became inactive                                                                                  |                                |                 | 6.0         | -36.3, 48.4       | 5.0             | -22.5, 32.6       | 4.3         | -50.6, 59.3        | -0.4        | -36.4, 35.7        |                 |        |             |
| Became active                                                                                    |                                |                 | 29.8        | -5.9, 65.5        | <b>42.6</b>     | <b>15.8, 69.4</b> | <b>57.9</b> | <b>11.0, 104.8</b> | <b>48.0</b> | <b>13.3, 82.8</b>  |                 |        |             |
| Remained active                                                                                  |                                |                 | <b>36.3</b> | <b>1.5, 71.2</b>  | <b>43.7</b>     | <b>16.9, 70.6</b> | 41.4        | -4.1, 86.8         | <b>34.8</b> | <b>0.2, 69.3</b>   |                 |        |             |

95% CI =95% confidence intervals; FEV<sub>1</sub> = forced expiratory volume in one second; FVC = forced vital capacity; N = number of participants included in the model

<sup>a</sup> adjusted for age, age-squared, height, weight, smoking status, secondhand smoke exposure, education and occupation. A positive estimate suggests that those more active at the first examination had higher average lung function at both examinations than those less active.

<sup>b</sup> adjusted for age, age-squared, height, weight, smoking status, secondhand smoke exposure, education, occupation and lung function at first examination. A positive estimate suggests better lung function on average at the second examination

bold: *P* value < 0.05

**Table S8.** Associations between vigorous physical activity and forced expiratory volume in one second, stratified by body mass index

| Vigorous physical activity levels                                                                | N                              | < 25 kg/m <sup>2</sup> |                   | N                | 25 - 30 kg/m <sup>2</sup> |              | N            | > 30 kg/m <sup>2</sup> |        |              |
|--------------------------------------------------------------------------------------------------|--------------------------------|------------------------|-------------------|------------------|---------------------------|--------------|--------------|------------------------|--------|--------------|
|                                                                                                  |                                | Mean difference (mL)   | 95% CI            |                  | Mean difference (mL)      | 95% CI       |              | Mean difference (mL)   | 95% CI |              |
| <b>Association with lung function<sup>a</sup></b>                                                |                                |                        |                   |                  |                           |              |              |                        |        |              |
| Frequency                                                                                        | <= 1 a month                   | 1966                   | reference         | 1394             | reference                 | 510          | reference    |                        |        |              |
|                                                                                                  | 1-3 times a week               |                        | 3.2               | -42.2, 48.7      | 37.5                      | -18.5, 93.5  | -25.4        | -128.0, 77.2           |        |              |
|                                                                                                  | > 4 times a week               |                        | 6.6               | -60.4, 73.6      | 46.4                      | -34.7, 127.4 | -61.1        | -197.2, 75.1           |        |              |
| Duration (per week)                                                                              | <= 30 minutes                  | 1954                   | reference         | 1383             | reference                 | 503          | reference    |                        |        |              |
|                                                                                                  | 1-3 hours                      |                        | 17.2              | -28.7, 63.2      | 33.7                      | -23.7, 91.2  | -43.7        | -148.3, 60.8           |        |              |
|                                                                                                  | >= 4 hours                     |                        | 36.7              | -25.2, 98.6      | 66.2                      | -9.8, 142.3  | -32.0        | -166.4, 102.4          |        |              |
| Active                                                                                           | >= 2 times a week and >=1 hour | 1952                   | <b>50.2</b>       | <b>7.4, 93.0</b> | 1383                      | 51.1         | -1.8, 104.1  | 503                    | -40.1  | -137.5, 57.3 |
| <b>Change in physical activity status on lung function at the second examination<sup>b</sup></b> |                                |                        |                   |                  |                           |              |              |                        |        |              |
| Remained non-active                                                                              | 1867                           | reference              |                   | 1344             | reference                 | 483          | reference    |                        |        |              |
| Became inactive                                                                                  |                                | 8.3                    | -22.4, 39.1       | 9.9              | -34.0, 53.8               | 7.3          | -77.1, 91.8  |                        |        |              |
| Became active                                                                                    |                                | 16.3                   | -12.1, 44.8       | <b>56.4</b>      | <b>17.8, 94.9</b>         | 75.9         | 0.0, 151.7   |                        |        |              |
| Remained active                                                                                  |                                | <b>39.6</b>            | <b>12.0, 67.2</b> | 31.3             | -6.7, 69.2                | 57.6         | -21.6, 136.8 |                        |        |              |

95% CI =95% confidence intervals; N = number of participants included in the model

<sup>a</sup> adjusted for sex, age, age-squared, height, smoking status, secondhand smoke exposure, education and occupation. A positive estimate suggests that those more active at the first examination had higher average lung function at both examinations than those less active.

<sup>b</sup> adjusted for sex, age, age-squared, height, smoking status, secondhand smoke exposure, education, occupation and lung function at first examination. A positive estimate suggests better lung function on average at the second examination

bold: *P* value < 0.05

**Table S9.** Associations between vigorous physical activity and forced vital capacity, stratified by body mass index

| Vigorous physical activity levels                                                                | N                              | < 25 kg/m <sup>2</sup> |             | 25 - 30 kg/m <sup>2</sup> |                      | > 30 kg/m <sup>2</sup> |             |                      |                   |              |
|--------------------------------------------------------------------------------------------------|--------------------------------|------------------------|-------------|---------------------------|----------------------|------------------------|-------------|----------------------|-------------------|--------------|
|                                                                                                  |                                | Mean difference (mL)   | 95% CI      | N                         | Mean difference (mL) | 95% CI                 | N           | Mean difference (mL) | 95% CI            |              |
| <b>Association with lung function<sup>a</sup></b>                                                |                                |                        |             |                           |                      |                        |             |                      |                   |              |
| Frequency                                                                                        | <= 1 a month                   | 1957                   | reference   | 1392                      | reference            | 507                    | reference   |                      |                   |              |
|                                                                                                  | 1-3 times a week               |                        | 15.4        | -36.2, 67.1               | 34.6                 | -31.7, 100.9           | 18.8        | -128.0, 90.4         |                   |              |
|                                                                                                  | > 4 times a week               |                        | 64.5        | -11.5, 140.6              | 76.4                 | -19.8, 172.6           | 0.7         | -144.0, 145.5        |                   |              |
| Duration (per week)                                                                              | <= 30 minutes                  | 1945                   | reference   | 1381                      | reference            | 500                    | reference   |                      |                   |              |
|                                                                                                  | 1-3 hours                      |                        | 15.7        | -36.6, 67.9               | 27.1                 | -41.1, 95.3            | -56.1       | -167.2, 54.9         |                   |              |
|                                                                                                  | >= 4 hours                     |                        | 66.6        | -3.8, 136.9               | 84.9                 | -5.0, 174.7            | 46.7        | [-96.2, 189.6]       |                   |              |
| Active                                                                                           | >= 2 times a week and >=1 hour | 1943                   | <b>66.0</b> | <b>17.3, 114.7</b>        | 1381                 | 53.9                   | -9.0, 116.7 | 500                  | -29.8             | -133.5, 73.8 |
| <b>Change in physical activity status on lung function at the second examination<sup>b</sup></b> |                                |                        |             |                           |                      |                        |             |                      |                   |              |
| Remained non-active                                                                              | 1814                           | reference              |             | 1304                      | reference            | 466                    | reference   |                      |                   |              |
| Became inactive                                                                                  |                                | 8.6                    | -32.1, 49.3 |                           | 18.2                 | -40.0, 76.5            |             | -28.0                | -130.3, 74.2      |              |
| Became active                                                                                    |                                | 27.1                   | -10.7, 64.8 |                           | <b>80.1</b>          | <b>28.5, 131.8</b>     |             | <b>98.3</b>          | <b>8.1, 188.5</b> |              |
| Remained active                                                                                  |                                | 26.6                   | -9.8, 63.0  |                           | 45.6                 | -4.6, 95.8             |             | 48.7                 | -45.5, 142.9      |              |

95% CI =95% confidence intervals; N = number of participants included in the model

<sup>a</sup>adjusted for sex, age, age-squared, height, smoking status, secondhand smoke exposure, education and occupation. A positive estimate suggests that those more active at the first examination had higher average lung function at both examinations than those less active.

<sup>b</sup>adjusted for sex, age, age-squared, height, smoking status, secondhand smoke exposure, education, occupation and lung function at first examination. A positive estimate suggests better lung function on average at the second examination

bold: *P* value < 0.05



**Table S10.** Associations (beta 95% CI) between vigorous physical activity and lung function, adjusted for lung function assessed at baseline

| Vigorous physical activity levels                                                                |                                         | FEV <sub>1</sub> (mL) |                 |                   | FVC (mL) |                 |                   |
|--------------------------------------------------------------------------------------------------|-----------------------------------------|-----------------------|-----------------|-------------------|----------|-----------------|-------------------|
|                                                                                                  |                                         | N                     | Mean difference | 95% CI            | N        | Mean difference | 95% CI            |
| <b>Association with lung function<sup>a</sup></b>                                                |                                         |                       |                 |                   |          |                 |                   |
| Frequency                                                                                        | <= 1 a month                            | 3560                  | reference       |                   | 3490     | reference       |                   |
|                                                                                                  | 1-3 times a week                        |                       | -9.8            | -30.9, 11.3       |          | 9.2             | -15.2, 33.7       |
|                                                                                                  | > 4 times a week                        |                       | -3.1            | -34.1, 27.8       |          | 28.3            | -7.7, 64.3        |
| Duration (per week)                                                                              | <= 30 minutes                           | 3533                  | reference       |                   | 3465     | reference       |                   |
|                                                                                                  | 1-3 hours                               |                       | -10.8           | -32.4, 10.8       |          | -0.8            | -25.9, 24.2       |
|                                                                                                  | >= 4 hours                              |                       | -1.6            | -30.5, 27.3       |          | 21.6            | -11.9, 55.0       |
| Active                                                                                           | >= 2 times a week and >=1 hour per week | 3531                  | 9.0             | -11.1, 29.2       | 3463     | <b>26.5</b>     | <b>3.1, 49.9</b>  |
| <b>Change in physical activity status on lung function at the second examination<sup>b</sup></b> |                                         |                       |                 |                   |          |                 |                   |
|                                                                                                  | Remained non-active                     | 3393                  | reference       |                   | 3248     | reference       |                   |
|                                                                                                  | Became inactive                         |                       | 6.7             | -18.5, 32.0       |          | -4.5            | -36.2, 27.3       |
|                                                                                                  | Became active                           |                       | <b>36.8</b>     | <b>14.2, 59.4</b> |          | <b>50.6</b>     | <b>22.3, 79.0</b> |
|                                                                                                  | Remained active                         |                       | <b>37.6</b>     | <b>15.2, 59.9</b> |          | <b>32.6</b>     | <b>4.5, 60.7</b>  |

95% CI =95% confidence intervals; FEV<sub>1</sub> = forced expiratory volume in one second; FVC = forced vital capacity; N = number of participants included in the model

<sup>a</sup> adjusted for sex, age, age-squared, height, weight, smoking status, secondhand smoke exposure, education and occupation and lung function at baseline (ECRHS I). A positive estimate suggests that those more active at the first examination had higher average lung function at both examinations than those less active.

<sup>b</sup> adjusted for sex, age, age-squared, height, weight, smoking status, secondhand smoke exposure, education, occupation and lung function at first examination (ECRHS II) and at baseline (ECRHS I). A positive estimate suggests better lung function on average at the second examination

bold: *P* value < 0.05
